# Supplementary material for: Mechanistic inference on the roles of oxygenic functional groups that activate peroxymonosulfates in graphene for advanced oxidation
Source: Royal Society of Chemistry journal article supplement (doi:10.1039/d2dt02757g), 2022-01-01
Supplement: d2dt02757g1.pdf [file d2dt02757g1.pdf]

## **Mechanistic inference on the roles of oxygenic functional groups to activate peroxymonosulfates in graphene for advanced oxidation**

Xuechun Zhou<sup>a,b</sup>, Gengping Wan<sup>a,\*</sup>, Guoqing Zhao<sup>a,b</sup>, Maofan Zhou<sup>a</sup>, Guizhen Wang<sup>a,b,\*</sup>

<sup>a</sup>Key Laboratory of Advanced Materials of Tropical Island Resources (Hainan University), Ministry of Education, Haikou 570228, China.

<sup>b</sup>School of Materials Science and Engineering, Hainan University, Haikou 570228, P. R. China

\*Corresponding authors.

Tel: +86-137 0040 8893. E-mail: wangguizhen0@hotmail.com (Guizhen Wang); wangengping001@163.com(Gengping Wan).

Based on the reported studies, the kinetic of BPA degradation was evaluated by pseudo-first order kinetics given in Eq (1).

$$\ln \frac{C_t}{C_0} = -k_{obs}t$$

Where  $C_t$  is the BPA concentration at actual time (t),  $C_0$  is the initial BPA concentration,  $k_{obs}$  is the rate constant and  $k_{SA}$  is the surface area normalized first order rate constant.

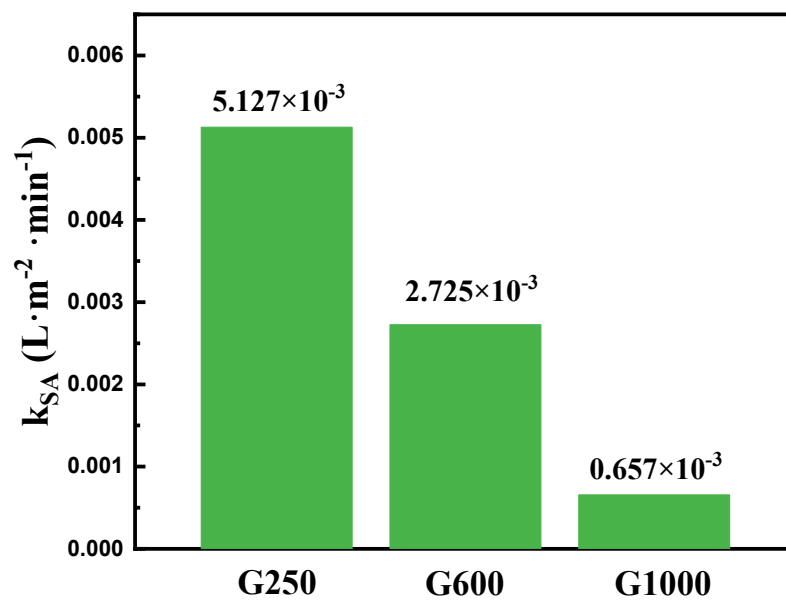

Fig. S1. Comparison of the  $k_{SA}$  values for various materials.

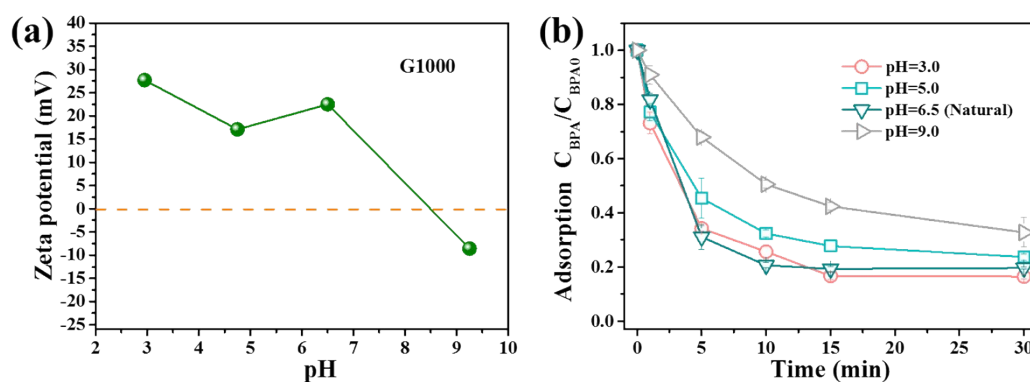

Fig. S2. The zeta potential of G1000 (a) and the adsorption of BPA (b) at different pH values. Reaction conditions:  $[BPA] = 19 \text{ mg L}^{-1}$ ,  $[catalyst] = 0.1 \text{ g L}^{-1}$ ,  $T = 298 \text{ K}$ .

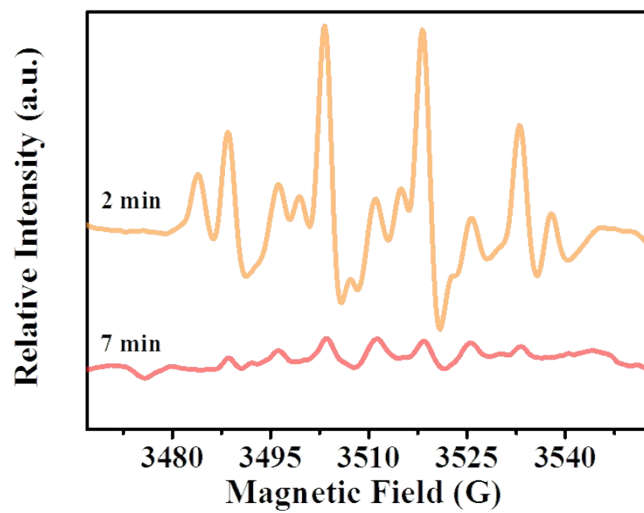

**Fig. S3.** EPR measurements with the addition of DMPO after 2 min and 7 min in the G1000/PMS system.

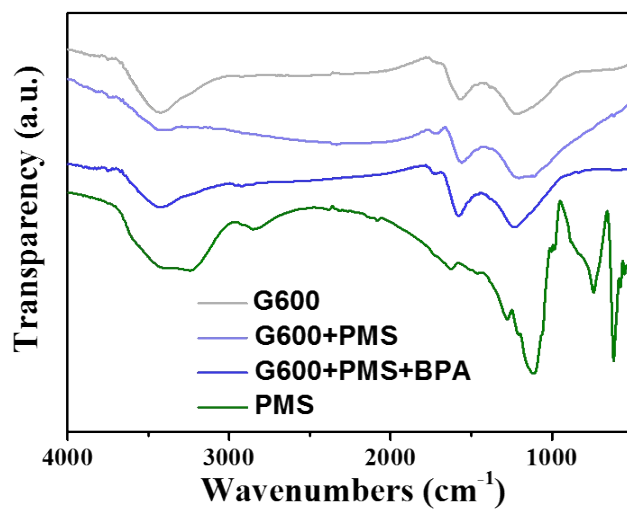

**Fig. S4.** FTIR spectra of G600 in different systems.

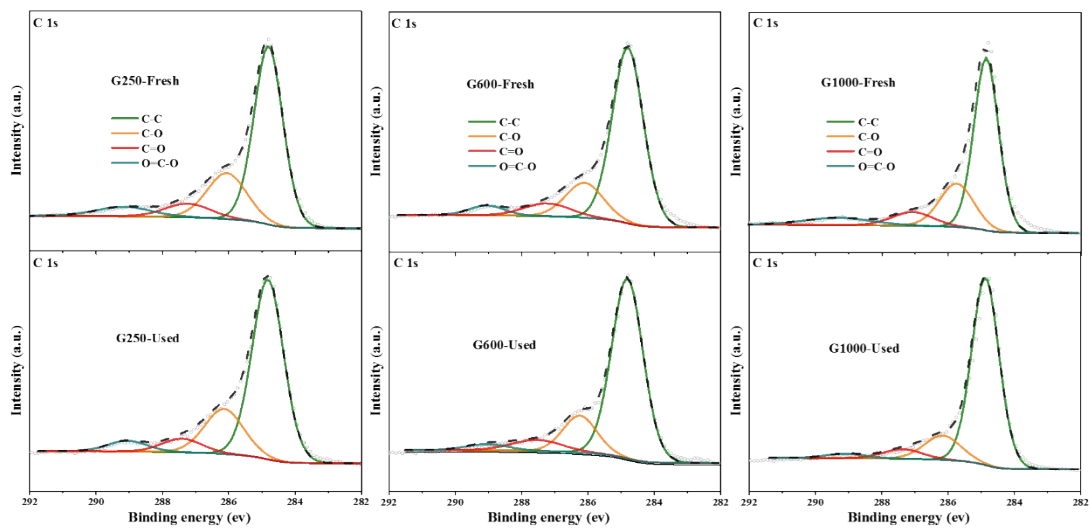

Fig. S5. High-resolution XPS spectra of C 1s of G250, G600 and G1000 before and after reactions.

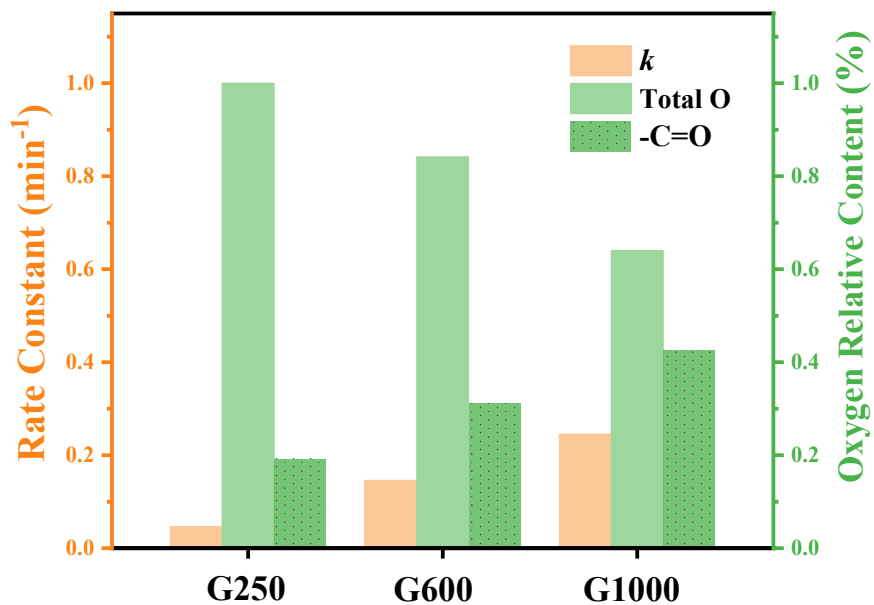

Fig. S6. The correlation between oxygen species content with rate constant.

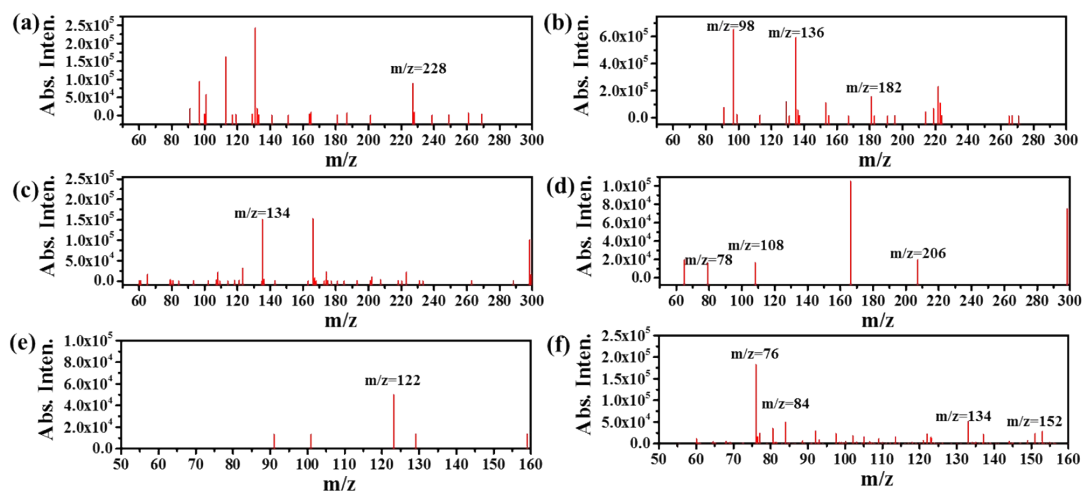

**Fig. S7.** (a)~(f) Mass spectrum of BPA degraded intermediates identified by LC-MS. Experimental conditions: [PMS] = 2.0 mM, [BPA] = 19 mg/L, [Catalyst] = 0.10 g/L, T = 298 K.

**Table S1.** Possible intermediates of BPA degradation.

| No. | Tentative structure                                                                 | Molecular formula | Molecular weight (m/z) |
|-----|-------------------------------------------------------------------------------------|-------------------|------------------------|
| 1   |  | $C_{15}H_{16}O_2$ | 228                    |
| 2   |  | $C_{14}H_{22}O$   | 206                    |
| 3   |  | $C_{14}H_{22}O$   | 206                    |
| 4   |  | $C_{13}H_{10}O$   | 182                    |
| 5   |  | $C_9H_{12}O_2$    | 152                    |
| 6   |  | $C_9H_{12}O_2$    | 152                    |
| 7   |  | $C_8H_8O_3$       | 152                    |
| 8   |  | $C_9H_{12}O$      | 136                    |

|    |                                                                                     |                |     |
|----|-------------------------------------------------------------------------------------|----------------|-----|
| 9  | 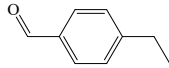   | $C_9H_{10}O$   | 134 |
| 10 |    | $C_9H_{10}O$   | 134 |
| 11 |    | $C_7H_6O_2$    | 122 |
| 12 |    | $C_8H_{10}O$   | 122 |
| 13 |    | $C_4H_{10}O_4$ | 122 |
| 14 |    | $C_7H_8O$      | 108 |
| 15 |    | $C_7H_8O$      | 108 |
| 16 |    | $C_6H_4O_2$    | 108 |
| 17 |   | $C_6H_{10}O$   | 98  |
| 18 |  | $C_5H_8O$      | 84  |
| 19 |  | $C_6H_6$       | 78  |
| 20 |  | $C_3H_8O_2$    | 76  |

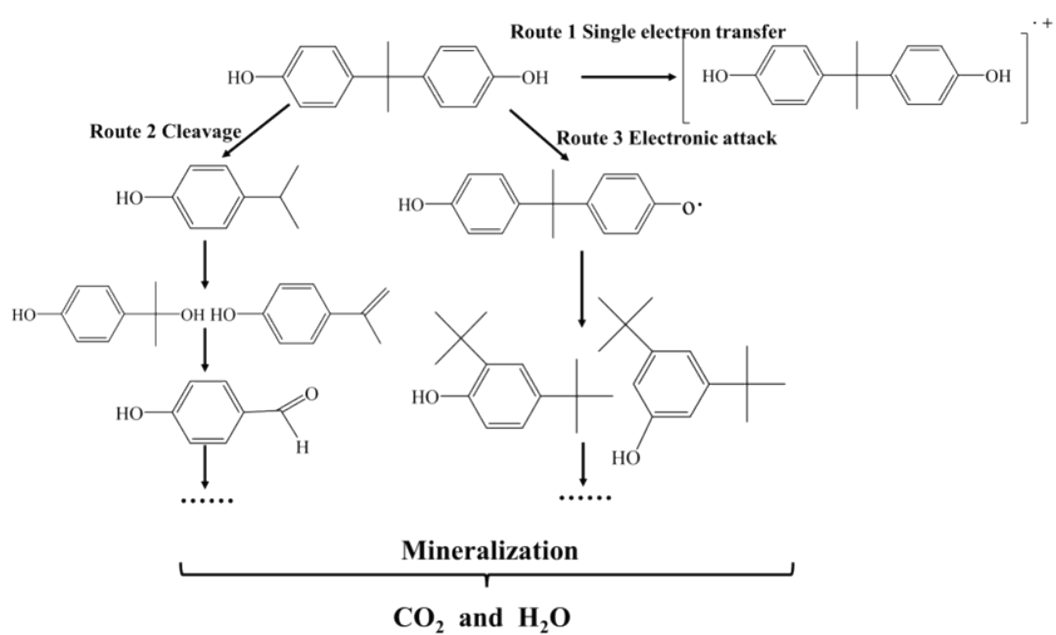

**Fig. S8.** The potential degradation pathway of BPA.

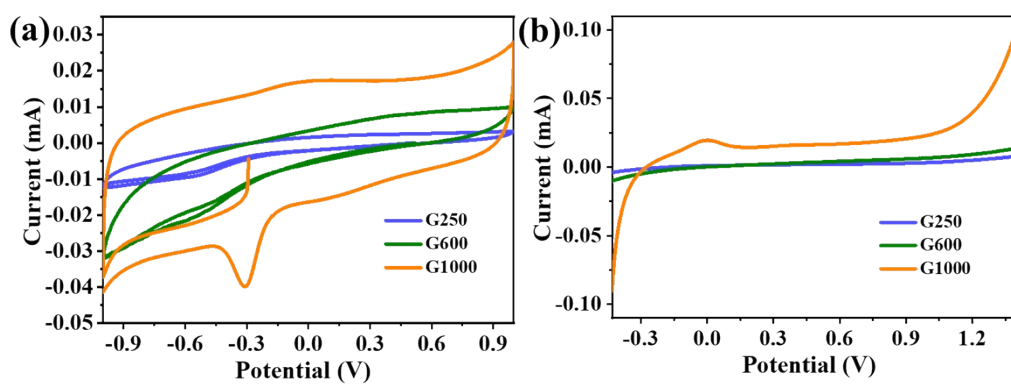

**Fig. S9.** (a) CVs of G250, G600 and G1000 at the rang from -0.9 to 0.9 V vs. Ag/AgCl; (b) LSV curves of G250, G600 and G1000.
